# Supplementary material for: Effectiveness of spironolactone for women with acne vulgaris (SAFA) in England and Wales: pragmatic, multicentre, phase 3, double blind, randomised controlled trial
Source: PubMed Central journal article supplement — BMJ. 2023 May 16;381:e074349. doi: 10.1136/bmj-2022-074349 (PMC10543374; doi:10.1136/bmj-2022-074349), 2023-05-16
Supplement: sanm074349.ww.pdf [file sanm074349.ww.pdf]

APPENDIX

Table S1 – Participant recruitment centres<sup>1</sup>

| Characteristic                                                            | Spirolactone<br>(n=201) | Placebo<br>(n=209) | Total<br>(n= 410) |
|---------------------------------------------------------------------------|-------------------------|--------------------|-------------------|
| Centre – n (%) <sup>2</sup>                                               |                         |                    |                   |
| Bristol Royal Infirmary                                                   | 34 (16.9%)              | 36 (17.2%)         | 70 (17.1%)        |
| Epsom Hospital                                                            | 7 (3.5%)                | 8 (3.8%)           | 15 (3.7%)         |
| Harrogate District Hospital                                               | 43 (21.4%)              | 46 (22.0%)         | 89 (21.7%)        |
| Nottingham University Hospitals NHS Trust – Queen’s Medical Centre Campus | 14 (7.0%)               | 14 (6.7%)          | 28 (6.8%)         |
| Poole General Hospital                                                    | 26 (12.9%)              | 26 (12.4%)         | 52 (12.7%)        |
| Queen Elizabeth Hospital (Birmingham)                                     | 23 (11.4%)              | 25 (12.0%)         | 48 (11.7%)        |
| Singleton Hospital (Swansea)                                              | 3 (1.5%)                | 4 (1.9%)           | 7 (1.7%)          |
| St Mary’s General Hospital (Portsmouth)                                   | 42 (20.9%)              | 42 (20.1%)         | 84 (20.5%)        |
| St Mary’s Hospital (HQ) (London)                                          | 6 (3.0%)                | 5 (2.4%)           | 11 (2.7%)         |
| University Hospital of Wales (Cardiff)                                    | 3 (1.5%)                | 3 (1.4%)           | 6 (1.5%)          |

<sup>1</sup> The numbers in this table relate to those with a baseline characteristics form available.

<sup>2</sup> These statistics are calculated using the number of participants with non-missing information available.

<sup>3</sup> This percentage is calculated as the number of participants with this information missing divided by those with the information available.

Table S2 – Baseline treatment use<sup>1</sup>

| Characteristic                                                                                                               | Spirolactone<br>(n=201) | Placebo<br>(n=209) | Total<br>(n=410) |
|------------------------------------------------------------------------------------------------------------------------------|-------------------------|--------------------|------------------|
| <b>Have you used, or are you currently using, topical treatments (creams/lotions/gels) for your acne?- n (%)<sup>2</sup></b> |                         |                    |                  |
| Yes                                                                                                                          | 169 (84.9%)             | 171 (82.2%)        | 340 (83.5%)      |
| No                                                                                                                           | 30 (15.1%)              | 37 (17.8%)         | 67 (16.5%)       |
| Missing – n (%) <sup>4</sup>                                                                                                 | 2 (1.0%)                | 1 (0.5%)           | 3 (0.7%)         |
| <b>If Yes<sup>3</sup>:</b>                                                                                                   |                         |                    |                  |
| Benzoyl peroxide                                                                                                             | 22/165 (13.3%)          | 30/168 (17.9%)     | 52/333 (15.6%)   |
| Azelaic acid                                                                                                                 | 10/165 (6.1%)           | 15/167 (9.0%)      | 25/332 (7.5%)    |
| Topical adapalene                                                                                                            | 22/167 (13.2%)          | 21/167 (12.6%)     | 43/334 (12.9%)   |
| Nicotinamide                                                                                                                 | 9/165 (5.5%)            | 3/167 (1.8%)       | 12/332 (3.6%)    |
| Antibiotic                                                                                                                   | 8/167 (4.8%)            | 6/167 (3.6%)       | 14/334 (4.2%)    |
| Combination                                                                                                                  | 28/167 (16.8%)          | 21/168 (12.5%)     | 49/335 (14.6%)   |
| Other                                                                                                                        | 20/137 (14.6%)          | 25/148 (16.9%)     | 45/285 (15.8%)   |
| Not sure                                                                                                                     | 7/134 (5.2%)            | 7/147 (4.8%)       | 14/281 (5.0%)    |
| <b>If topical treatments have been prescribed, how often are they used?<sup>2</sup></b>                                      |                         |                    |                  |
| Not at all                                                                                                                   | 17 (8.5%)               | 32 (15.3%)         | 49 (12.0%)       |
| Less than once a day                                                                                                         | 16 (8.0%)               | 19 (9.1%)          | 35 (8.6%)        |
| Once a day                                                                                                                   | 62 (31.0%)              | 58 (27.8%)         | 120 (29.3%)      |
| Twice a day                                                                                                                  | 25 (12.5%)              | 20 (9.6%)          | 45 (11.0%)       |
| More than twice a day                                                                                                        | 1 (0.5%)                | 2 (1.0%)           | 3 (0.7%)         |
| Not been prescribed topical treatments                                                                                       | 64 (32.0%)              | 64 (30.6%)         | 128 (31.3%)      |
| Not answered                                                                                                                 | 16 (8.0%)               | 14 (6.7%)          | 30 (7.3%)        |

| <b>Characteristic</b>                                                                | <b>Spirolactone<br/>(n=201)</b> | <b>Placebo<br/>(n=209)</b> | <b>Total<br/>(n=410)</b> |
|--------------------------------------------------------------------------------------|---------------------------------|----------------------------|--------------------------|
| <b>Is the participant currently using any hormonal treatment – n (%)<sup>2</sup></b> |                                 |                            |                          |
| Yes                                                                                  | 81 (40.3%)                      | 91 (43.5%)                 | 172 (42.0%)              |
| No                                                                                   | 120 (59.7%)                     | 118 (56.5%)                | 238 (58.1%)              |
| <b>If 'Yes', please state which hormonal treatment<sup>5</sup></b>                   |                                 |                            |                          |
| Combined oral contraception <sup>6</sup>                                             | 27 (33.3%)                      | 22 (24.2%)                 | 49 (28.5%)               |
| Progesterone only pill or other progesterone only contraception <sup>7</sup>         | 54 (66.7%)                      | 69 (75.8%)                 | 123 (71.5%)              |

<sup>1</sup> The numbers in this table relate to those with acne medication available.

<sup>2</sup> These statistics or percentages are calculated using the number of participants with non-missing information available.

<sup>3</sup> These percentages are calculated using the number of participants who are currently using topical treatments or currently using topical treatments and have also been using them in the past divided by those with non-missing information.

<sup>4</sup> This percentage is calculated as the number of participants with this information missing divided by those with acne medication information/contraception information available.

<sup>5</sup> These statistics or percentages are calculated using the number of participants who answered yes to using hormonal treatment.

<sup>6</sup> Participants taking co-cyprindiol are included in 'combined oral contraception'. There were 5 participants who reported taking co-cyprindiol, 3 in the spironolactone group and 2 in the placebo group.

<sup>7</sup> Other progesterone only contraception includes: contraceptive implant, IUCS or contraceptive injection

Table S3 Baseline assessments of acne<sup>1</sup>

| Characteristic                                                                                                | Spiro<br>nolacton<br>e<br>(n=201) | Placebo<br>(n=209) | Total<br>(n=410) |
|---------------------------------------------------------------------------------------------------------------|-----------------------------------|--------------------|------------------|
| <b>How would you describe the acne on your face at the moment? – n (%)<sup>2</sup></b>                        |                                   |                    |                  |
| Clear                                                                                                         | 0 (0.0%)                          | 0 (0.0%)           | 0 (0.0%)         |
| Almost clear                                                                                                  | 3 (1.5%)                          | 1 (0.5%)           | 4 (1.0%)         |
| Mild severity                                                                                                 | 37 (18.4%)                        | 49 (23.4%)         | 86 (21.0%)       |
| Moderate severity                                                                                             | 115 (57.2%)                       | 101 (48.3%)        | 216 (52.7%)      |
| Severe                                                                                                        | 44 (21.9%)                        | 58 (27.8%)         | 102 (24.9%)      |
| Not answered                                                                                                  | 2 (1.0%)                          | 0 (0.0%)           | 2 (0.5%)         |
| <b>Using the IGA scale for acne, how would you describe the participant's facial acne – n (%)<sup>2</sup></b> |                                   |                    |                  |
| Clear                                                                                                         | 0 (0.0%)                          | 0 (0.0%)           | 0 (0.0%)         |
| Almost clear                                                                                                  | 0 (0.0%)                          | 0 (0.0%)           | 0 (0.0%)         |
| Mild severity                                                                                                 | 92 (45.8%)                        | 98 (46.9%)         | 190 (46.3%)      |
| Moderate severity                                                                                             | 84 (41.8%)                        | 82 (39.2%)         | 166 (40.5%)      |
| Severe                                                                                                        | 25 (12.4%)                        | 29 (13.9%)         | 54 (13.2%)       |

<sup>1</sup> The numbers in this table relate to those with a baseline self-assessment available.

<sup>2</sup> These statistics or percentages are calculated using the number of participants with non-missing information available.

<sup>3</sup> This percentage is calculated as the number of participants with this information missing divided by those with the baseline self-assessment/IGA/contraception information available.

Table S4 Secondary outcomes – other Acne-QoL subscales and total Acne-QoL score at 12 and 24 weeks

| Outcome                                                        | n   | Mean score<br>spironolactone<br>(N=201) | n   | Mean<br>score<br>placebo<br>(N=209) | Unadjusted<br>mean<br>difference in<br>score (95%<br>CI) | Adjusted*<br>mean<br>difference in<br>score (95%<br>CI) |
|----------------------------------------------------------------|-----|-----------------------------------------|-----|-------------------------------------|----------------------------------------------------------|---------------------------------------------------------|
| Acne-QoL role-social subscale score at 12 weeks (mean, SD)     | 176 | 18.7 (6.1)                              | 165 | 17.0 (6.7)                          | 1.88 (0.64 to 3.13)                                      | <b>1.99 (0.70 to 3.28)</b>                              |
| Acne-QoL role-emotional subscale score at 12 weeks (mean, SD)  | 175 | 20.2 (7.8)                              | 166 | 17.5 (8.1)                          | 2.66 (1.08 to 4.25)                                      | <b>2.75 (1.11 to 4.39)</b>                              |
| Acne-QoL self-perception subscale score at 12 weeks (mean, SD) | 175 | 19.2 (8.5)                              | 166 | 16.9 (8.2)                          | 2.21 (0.55 to 3.86)                                      | <b>2.10 (0.39 to 3.82)</b>                              |
| Acne-QoL total score at 12 weeks (mean, SD)                    | 176 | 77.0 (26.5)                             | 166 | 69.0 (26.2)                         | 8.18 (2.98 to 13.38)                                     | <b>8.03 (2.68 to 13.37)</b>                             |
| Acne-QoL role-social subscale score at 24 weeks (mean, SD)     | 163 | 19.6 (5.6)                              | 136 | 16.7 (6.8)                          | 3.03 (1.78 to 4.28)                                      | <b>3.06 (1.77 to 4.35)</b>                              |

|                                                                          |     |             |     |             |                        |                               |
|--------------------------------------------------------------------------|-----|-------------|-----|-------------|------------------------|-------------------------------|
| <b>Acne-QoL role-emotional subscale score at 24 weeks</b><br>(mean, SD)  | 164 | 21.1 (7.3)  | 137 | 16.5 (8.2)  | 4.50 (2.81 to 6.18)    | <b>4.35 (2.64 to 6.05)</b>    |
| <b>Acne-QoL self-perception subscale score at 24 weeks</b><br>(mean, SD) | 164 | 21.3 (7.7)  | 137 | 16.3 (8.7)  | 4.98 (3.23 to 6.74)    | <b>4.77 (2.97 to 6.56)</b>    |
| <b>Acne-QoL total score at 24 weeks</b> (mean, SD)                       | 164 | 83.0 (25.0) | 137 | 66.7 (27.5) | 16.25 (10.66 to 21.84) | <b>15.73 (10.04 to 21.42)</b> |

\*Adjusted for stratification factors (site and baseline severity (IGA < 3 versus 3 or more)), baseline acne-QoL symptom subscale score, topical treatment use (yes/no to using any topical treatment), hormonal treatment, age and PCOS status.

Table S5 Secondary outcomes – oral acne treatments used by participants at 24 and up to 52 weeks

| Characteristic                          | Spironolactone<br>(n=201) | Placebo<br>(n=209) | Total<br>(n=410) |
|-----------------------------------------|---------------------------|--------------------|------------------|
| <b>At 24 weeks</b>                      |                           |                    |                  |
| <b>Are you using oral antibiotic?</b>   |                           |                    |                  |
| N                                       | 168                       | 146                | 314              |
| Yes                                     | 4 (2.4%)                  | 6 (4.1%)           | 10 (3.2%)        |
| <b>Are you using oral isotretinoin?</b> |                           |                    |                  |
| N                                       | 168                       | 146                | 314              |
| Yes                                     | 0 (0.0%)                  | 0 (0.0%)           | 0 (0.0%)         |
| <b>At 52 weeks</b>                      |                           |                    |                  |
| <b>Are you using oral antibiotic?</b>   |                           |                    |                  |
| N                                       | 103                       | 89                 | 192              |
| Yes                                     | 6 (5.8%)                  | 12 (13.5%)         | 18 (9.4%)        |
| <b>Are you using spironolactone?</b>    |                           |                    |                  |
| N                                       | 103                       | 89                 | 192              |
| Yes                                     | 36 (35.0%)                | 25 (28.1%)         | 61 (31.8%)       |
| <b>Are you using oral isotretinoin?</b> |                           |                    |                  |
| N                                       | 103                       | 89                 | 192              |
| Yes                                     | 2 (1.9%)                  | 6 (6.7%)           | 8 (4.2%)         |

| Characteristic | Spirolactone<br>(n=201) | Placebo<br>(n=209) | Total<br>(n=410) |
|----------------|-------------------------|--------------------|------------------|
|----------------|-------------------------|--------------------|------------------|

\* Data represents responses to questionnaire asking whether they were taking medication by mouth (yes/no/not answered). If they answered yes, they then had the option of ticking “yes” to a specific medication or leave it not answered.

Table S6 Subgroup analyses

| Subgroup                                                        | n   | Mean score<br>spironolactone (N=201) | n   | Mean score<br>placebo (N=209) | Adjusted* mean<br>difference in<br>score (95% CI) | p-value of the<br>interaction term<br>in the adjusted*<br>model |
|-----------------------------------------------------------------|-----|--------------------------------------|-----|-------------------------------|---------------------------------------------------|-----------------------------------------------------------------|
| PCOS status                                                     |     |                                      |     |                               |                                                   |                                                                 |
| With PCOS or suspected PCOS                                     | 26  | 17.4 (6.0)                           | 35  | 17.3 (5.2)                    | 1.37 (-1.40 to 4.14)                              | REF                                                             |
| Without PCOS or suspected PCOS                                  | 144 | 19.4 (6.2)                           | 124 | 17.7 (5.8)                    | <b>1.46 (0.12 to 2.80)**</b>                      | 0.642                                                           |
| Age group                                                       |     |                                      |     |                               |                                                   |                                                                 |
| Below 25 years                                                  | 44  | 16.9 (5.8)                           | 46  | 18.7 (5.6)                    | -0.87 (-3.67 to 1.92)                             | REF                                                             |
| 25 years and above                                              | 132 | 20.0 (6.0)                           | 120 | 17.4 (5.6)                    | <b>2.42 (1.00 to 3.84)</b>                        | 0.005                                                           |
| BMI                                                             |     |                                      |     |                               |                                                   |                                                                 |
| BMI ≤ 25                                                        | 99  | 19.8 (5.7)                           | 82  | 17.7 (5.2)                    | 1.89 (0.32 to 3.46)                               | REF                                                             |
| BMI >25                                                         | 77  | 18.4 (6.6)                           | 84  | 17.8 (6.0)                    | 0.34 (-1.56 to 2.24)                              | 0.244                                                           |
| IGA                                                             |     |                                      |     |                               |                                                   |                                                                 |
| IGA < 3                                                         | 79  | 20.4 (5.8)                           | 80  | 18.2 (5.8)                    | 1.63 (-0.10 to 3.35)                              | REF                                                             |
| IGA ≥ 3                                                         | 97  | 18.3 (6.2)                           | 86  | 17.4 (5.4)                    | 1.35 (-0.33 to 3.03)                              | 0.877                                                           |
| Hormonal contraception                                          |     |                                      |     |                               |                                                   |                                                                 |
| Not taking                                                      | 102 | 18.8 (6.1)                           | 90  | 17.5 (5.7)                    | 1.79 (0.12 to 3.46)                               | REF                                                             |
| Combined oral contraceptive                                     | 27  | 21.1 (6.7)                           | 18  | 19.2 (6.1)                    | 2.70 (-1.77 to 7.17)                              | 0.560                                                           |
| Progesterone only pill or other progesterone only contraception | 47  | 18.9 (5.8)                           | 58  | 17.7 (5.3)                    | 1.03 (-0.83 to 2.90)                              | 0.705                                                           |
| Topical treatment at Baseline                                   |     |                                      |     |                               |                                                   |                                                                 |
| Not using                                                       | 24  | 18.8 (5.8)                           | 27  | 17.2 (6.7)                    | 1.91 (-1.82 to 5.65)                              | REF                                                             |
| Using                                                           | 150 | 19.2 (6.1)                           | 138 | 17.9 (5.4)                    | 1.22 (-0.09 to 2.53)                              | 0.566                                                           |
| COVID                                                           |     |                                      |     |                               |                                                   |                                                                 |
| Pre-COVID                                                       | 35  | 20.1 (6.3)                           | 32  | 17.7 (4.7)                    | N/A                                               | N/A                                                             |
| Post-COVID                                                      | 141 | 19.0 (6.1)                           | 134 | 17.8 (5.8)                    | N/A                                               | N/A                                                             |
| Ethnicity                                                       |     |                                      |     |                               |                                                   |                                                                 |
| White                                                           | 143 | 19.6 (6.1)                           | 149 | 17.4 (5.6)                    | N/A                                               | N/A                                                             |
| Non-White                                                       | 15  | 16.1 (5.6)                           | 7   | 19.9 (5.3)                    | N/A                                               | N/A                                                             |

Statistically significant differences indicated in **bold**

\*Adjusted for stratification factors (site and baseline severity (IGA < 3 versus 3 or more)), baseline acne-QoL symptom subscale score, topical treatment use (yes/no to using any topical treatment), hormonal treatment, age and PCOS status.

\*\*When an interaction term for PCOS was included in the adjusted model, the interaction term was found to be insignificant (p-value = 0.642), therefore no strong conclusions should be made concerning the effect of spironolactone by PCOS status
